# Supplementary material
Source: publisher site journal article supplement (https://www.dovepress.com/article/422371)
Supplement: Supplementary file 1 [file get_supplementary_file.php]

**List of documents submitted to the Ethics Committee**

1. Presentation letter v. 4/2/2022
2. Protocol v. 4/2/2022
3. Synopsis v. 4/2/2022
4. SPIRIT Checklist v. 6/12/2021
5. Informed consent to the study v. 4/2/2022
6. Informed consent to personal data treatment v. 6/12/2021
7. Invitation letter for participants v. 4/2/2022
8. Questionnaire sent to participants v. 6/12/2021
9. Letter for General Practitioner v. 4/2/2022
10. CRF v. 6/12/2021
11. Form for hospital involvement v. 2/12/2021
12. Table with laboratory costs v. del 6/12/2021
13. CV Prof. Forti v. 27/12/2021
14. Conflicts of Interest v. 29/12/2021
15. Collaboration Dr. Pandolfi v. 30/11/2021
16. Collaboration Prof. Muscari v. 30/11/2021
17. Collaboration Dr. Mancini (Head of Laboratory) v. 30/11/2021
18. Declaration Dr. De Palma (Legal Medicine) v. 6/12/2021
19. Article on proBNPage background and development 11/8/2020
20. Article on proBNPage and manifestations of aging 13/5/2021
21. Description of food supplements v. 4/2/2022
22. Draft of University-Hospital convention
23. Agreement with Quidel company
24. Agreement with Pharma Nord company
25. Agreement with NOW Foods company
26. Agreement with TA Sciences company
27. Certificate of analysis of Resveratrol v. 22/12/2020
28. GMP certificate Now Foods v. 13/11/2018
29. Certificate of analysis of TA-65 (10/11/2020) + GRAS (13/10/2014) + GMP certificate TA Sciences (25/1/2019)
30. Certificate of analysis of Coenzime Q10 + Placebo-1 v. 5/6/2020
31. Certificate of analysis of Selenium + Placebo 2 v. 23/6/2020
32. GMP certificate Pharma Nord v. 21/4/2020
33. Collaboration of Farmacy v. 6/12/2021
34. Questionnaire EuroQoL 5D v. 6/12/2021
35. No onorarium to Prof. Forti v. 29/12/2021
36. No-profit study v. 29/12/2021
